# Supplementary material for: AIE active fluorescent organic nanoparticles based optical detection of Cu2+ ions in pure water: a case of aggregation–disaggregation reversibility
Source: Royal Society of Chemistry journal article supplement (doi:10.1039/d3ay02070c), 2024-01-01
Supplement: d3ay02070c1.pdf [file d3ay02070c1.pdf]

**Electronic Supplementary Information**

**AIE Active Fluorescent Organic Nanoparticles based Optical Detection of Cu<sup>2+</sup> ion in Pure Water: A Case of Aggregation-disaggregation Reversibility**

Subhajit Saha,<sup>a†</sup> Suvendu Paul,<sup>b†</sup> Rakesh Debnath,<sup>a</sup> Nilanjan Dey,<sup>\*b</sup> Bhaskar Biswas<sup>\*a</sup>

<sup>a</sup>*Department of Chemistry, University of North Bengal, Darjeeling 734013, India.*

*E-mail: [bhaskarbiswas@nbu.ac.in](mailto:bhaskarbiswas@nbu.ac.in), [icbbiswas@nbu.ac.in](mailto:icbbiswas@nbu.ac.in).*

<sup>b</sup>*Department of Chemistry, BITS-Pilani Hyderabad Campus, Shameerpet, Hyderabad-500078 Telangana, India. Email: [nilanjandey.iisc@gmail.com](mailto:nilanjandey.iisc@gmail.com), [nilanjan@hyderabad.bits-pilani.ac.in](mailto:nilanjan@hyderabad.bits-pilani.ac.in).*

†: Contributed equally

### General methods for characterization

<sup>1</sup>H-NMR and <sup>13</sup>C-NMR spectra were recorded with a Bruker Advance DRX 400 spectrometer (Billerica, Massachusetts, USA) operating at 400 and 100 MHz respectively. Chemical Shifts are reported in ppm downfield from the internal standard: TMS, for <sup>1</sup>H-NMR. FTIR spectra were recorded on a Perkin-Elmer FT-IR Spectrum BX system (PerkinElmer, Massachusetts, USA). Mass spectra were recorded on Micro mass Q-TOF Micro TM spectrometer (Bruker, Massachusetts, USA). Elemental analysis was recorded using Thermo Finnigan EA FLASH 1112 SERIES (Thermo Finnigan, California, United States).

**Synthesis of 1:** The synthesis of **1** has been performed following the procedure reported in the literature. 1-pyrenyl aldehyde (0.64 g, 2.8 mmol), 2-acetyl pyridine (0.67 g, 5.5 mmol), acetamide (3.94 g, 67 mmol) and ammonium acetate (3 g, 37.7 mmol) were taken in a round bottom flask and heated at 180°C for 3 h with stirring. Subsequently, NaOH solution (10 % v/v: NaOH in excess) was added to the reaction mixture and heated at 120°C for a further 2 h without stirring. The reaction mixture was then extracted with CHCl<sub>3</sub> and the crude product was purified over silica gel chromatography using hexane-ethyl acetate as mobile phase (while powder, yield: 62 %).

**Characterization:** <sup>1</sup>H-NMR (500 MHz, CDCl<sub>3</sub>): δ 7.35-7.39 (m, 2H), 7.9-7.94 (m, 2H), 8.02-8.28 (m, 9H), 8.68-8.7 (m, 2H), 8.74-8.78 (m, 4H), <sup>13</sup>C NMR (100 MHz, CDCl<sub>3</sub>): δ 155.8, 154.3, 151.8, 148.6, 137.3, 135.0, 132.1, 131.4, 130.5, 128.7, 128.3, 128.0, 127.8, 127.2, 126.5, 125.7, 125.2, 124.9, 124.5, 124.3, 124.0, 123.2, 122.5. EI MS: m/z 433 (M<sup>+</sup>). Anal calcd. for C<sub>31</sub>H<sub>19</sub>N<sub>3</sub>: calcd: C 85.89 %, H 4.42 %, N 9.69 %; found: C 86.08 %, H 4.54 %, N 9.68 %.

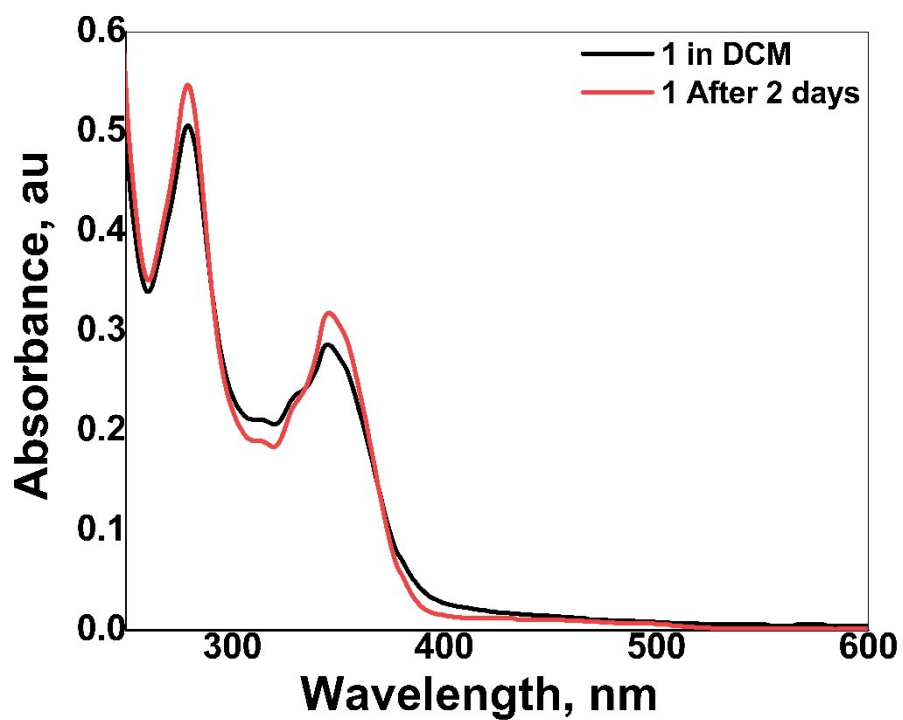

Figure S1: Absorption spectra of 1 (10  $\mu$ M) in DCM with a gap of 2 days.

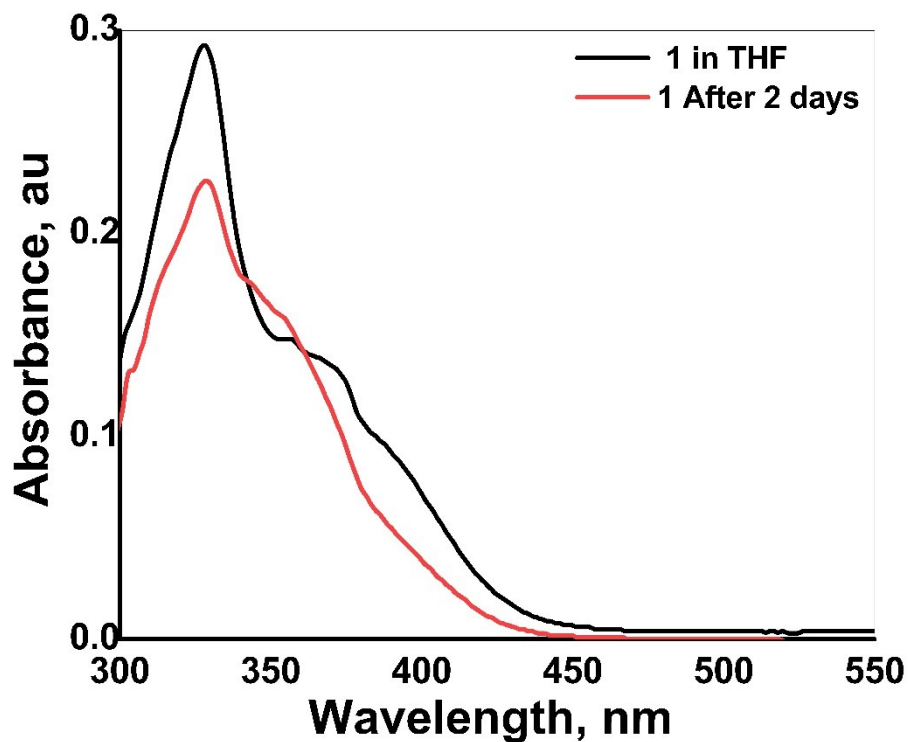

Figure S2: Absorption spectra of 1 (10  $\mu$ M) in THF with a gap of 2 days.

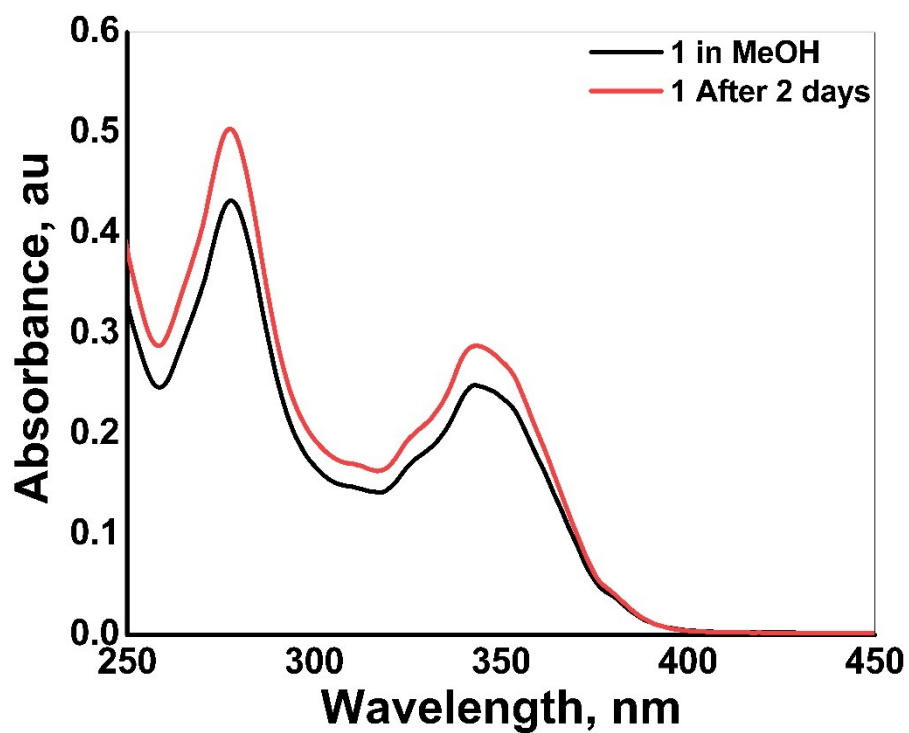

Figure S3: Absorption spectra of 1 (10  $\mu$ M) in MeOH with a gap of 2 days.

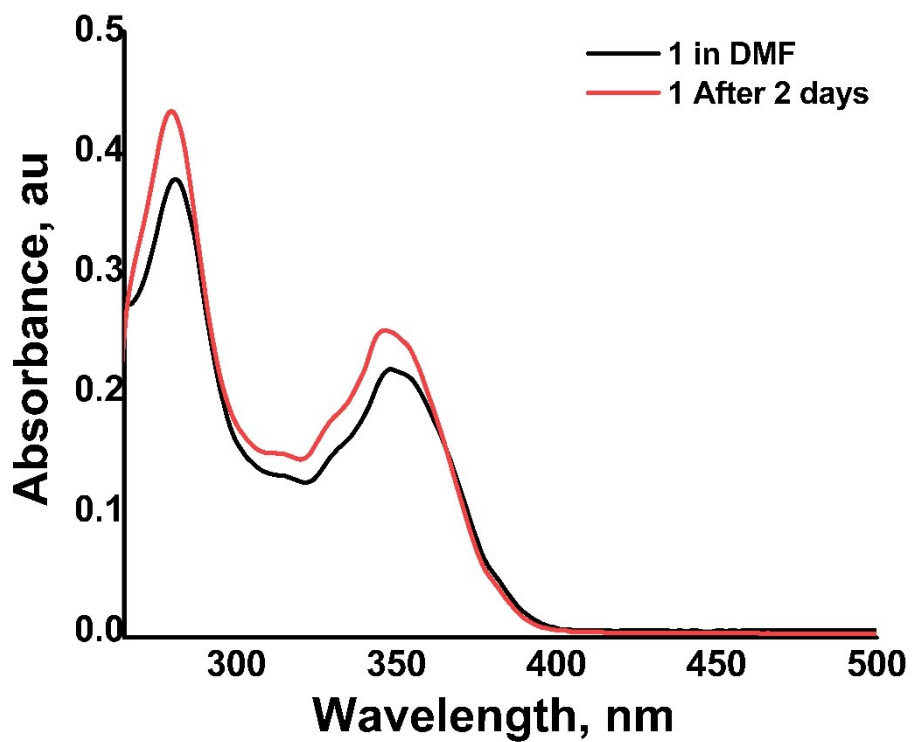

Figure S4: Absorption spectra of 1 (10  $\mu$ M) in DMF with a gap of 2 days.

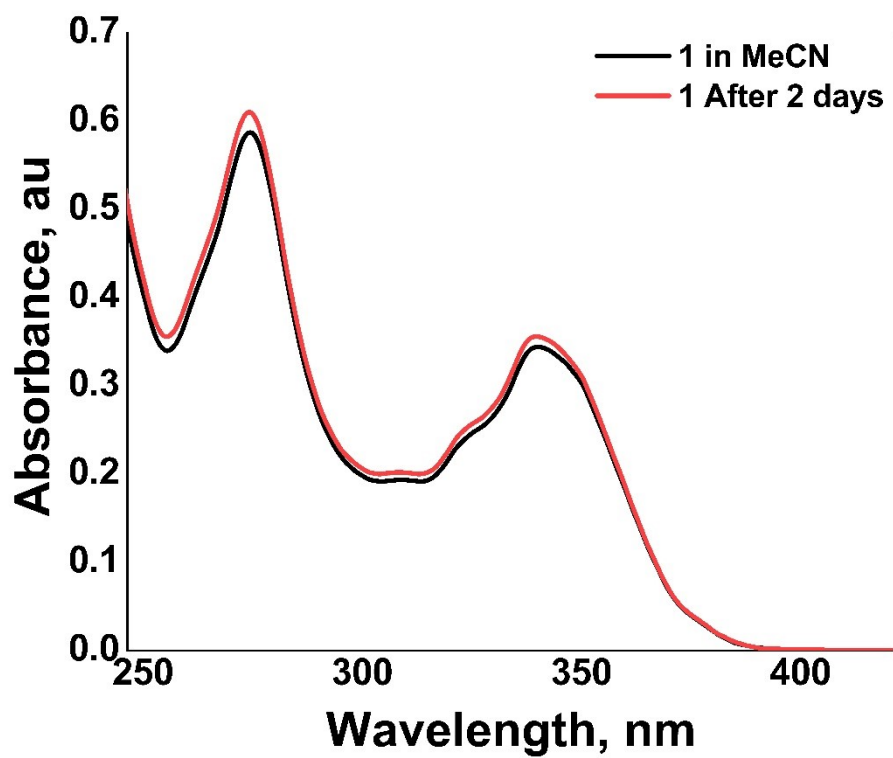

Figure S5: Absorption spectra of **1** (10  $\mu$ M) in MeCN with a gap of 2 days.

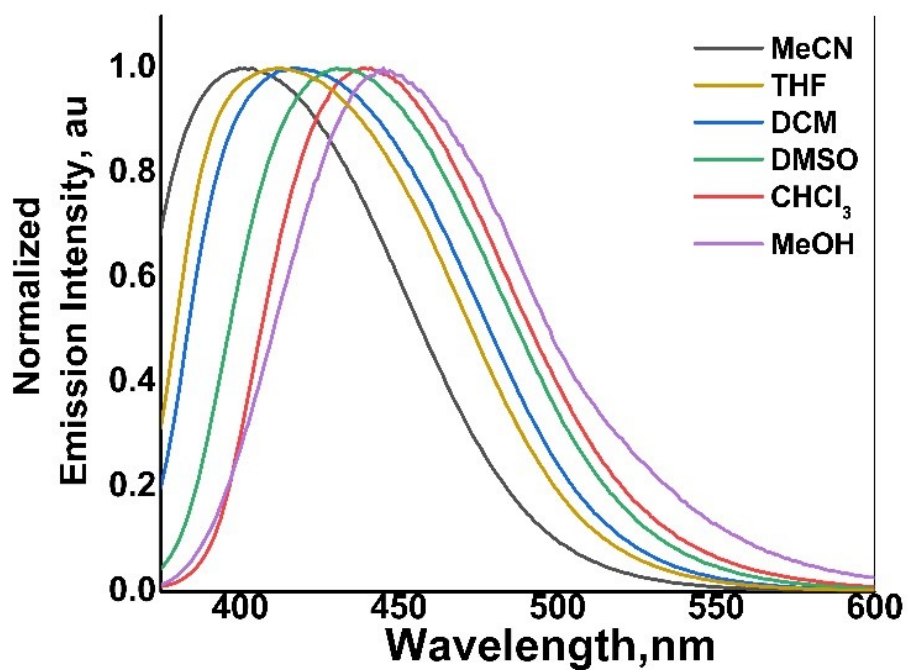

Figure S6: Normalised emission spectra of **1** (10  $\mu$ M) in different solvents ( $\lambda_{ex}$  = 340 nm).

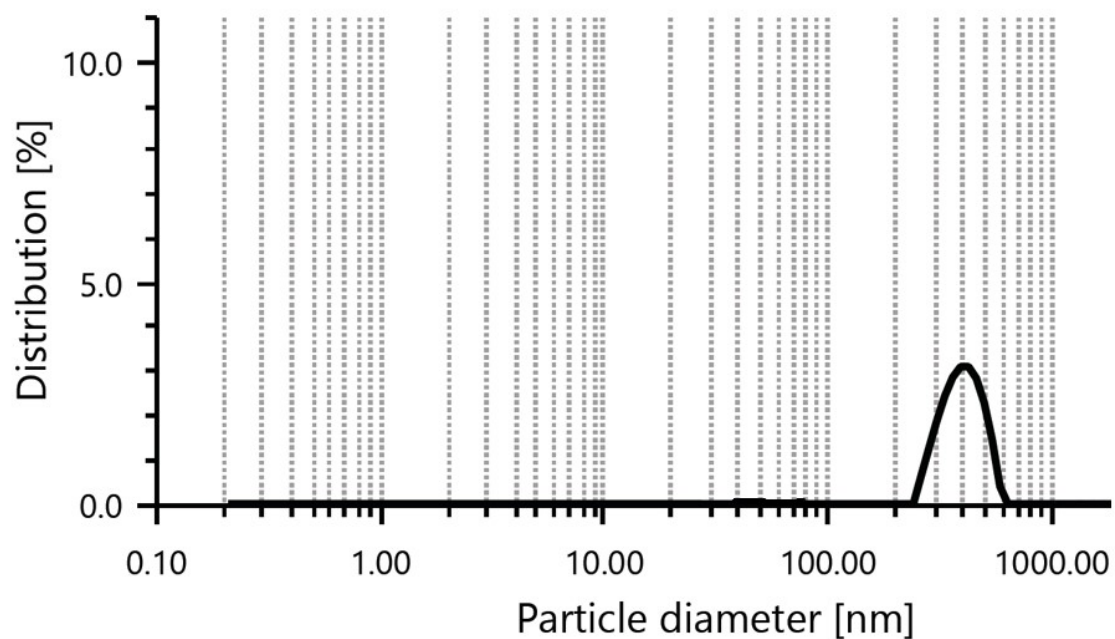

Figure S7: DLS size distribution plot of suspension 1 in water.

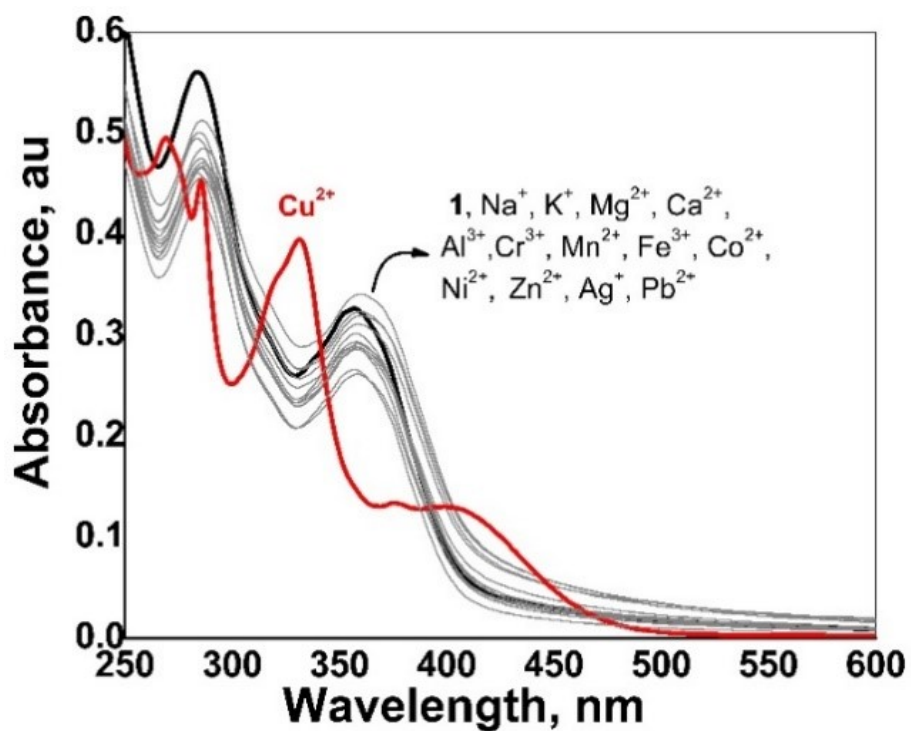

Figure S8: Absorption spectral selectivity of 1 (10  $\mu\text{M}$ ) in the presence of different metal ion salts (300  $\mu\text{M}$ ) in water.

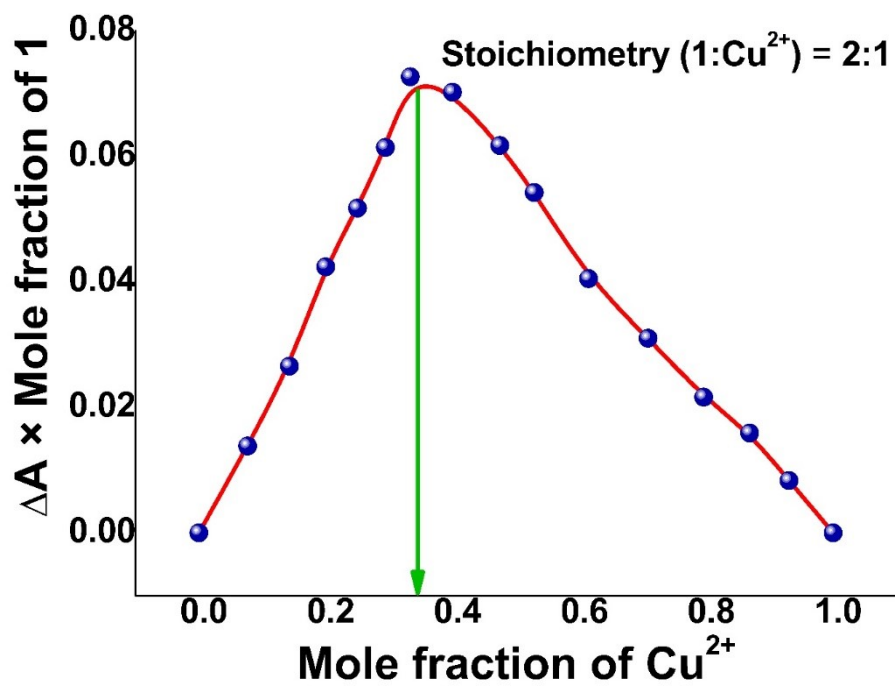

Figure S9: Job's plot of **1** ( $10 \mu\text{M}$ ) with different mole fraction of  $\text{CuCl}_2$  in water.

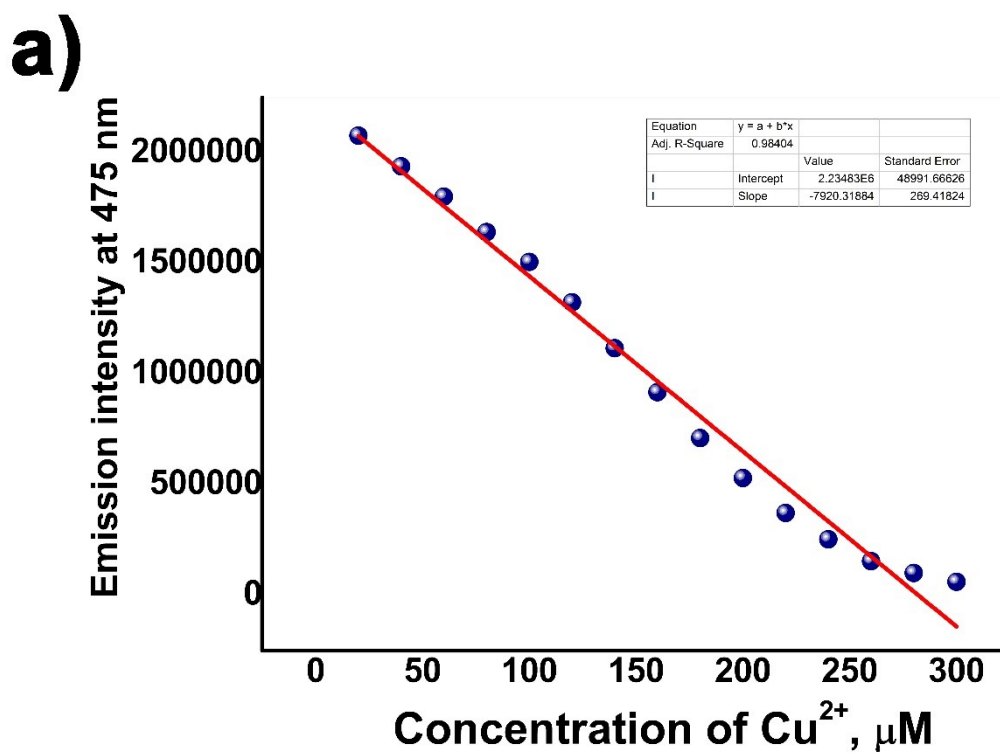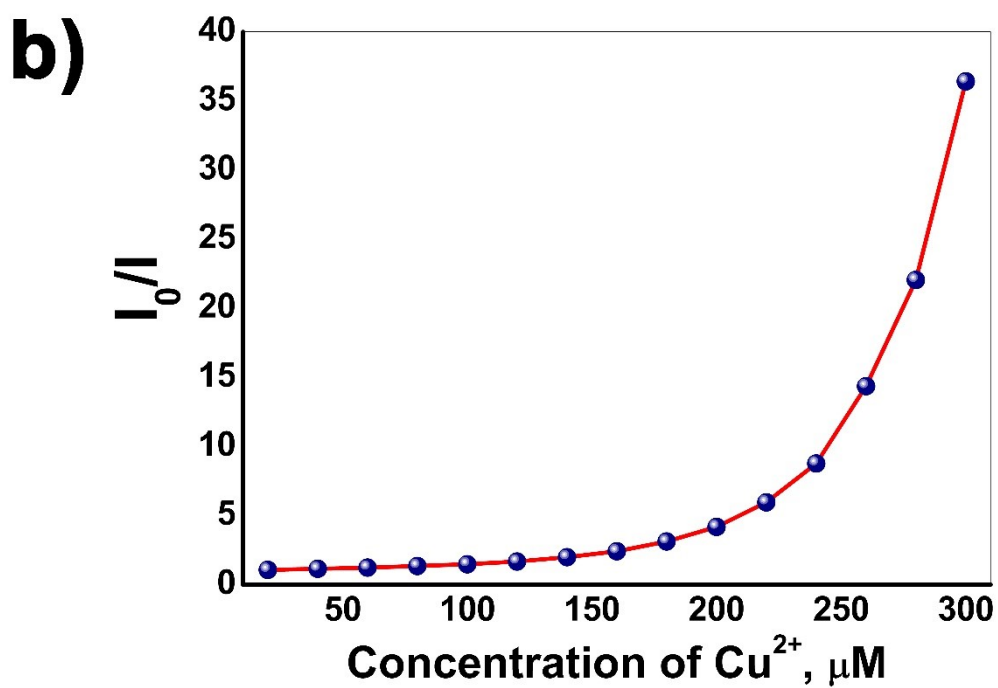

**Figure S10:** a) Linear fit curve of the fluorescence titration of **1** with  $\text{CuCl}_2$ ; b) SV plot. ( $[\mathbf{1}] = 10 \mu\text{M}$ ;  $[\text{Cu}^{2+}] = 0\text{-}300 \mu\text{M}$ ;  $\lambda_{\text{ex}} = 340 \text{ nm}$ ,  $\lambda_{\text{em}} = 475 \text{ nm}$ ) in water.



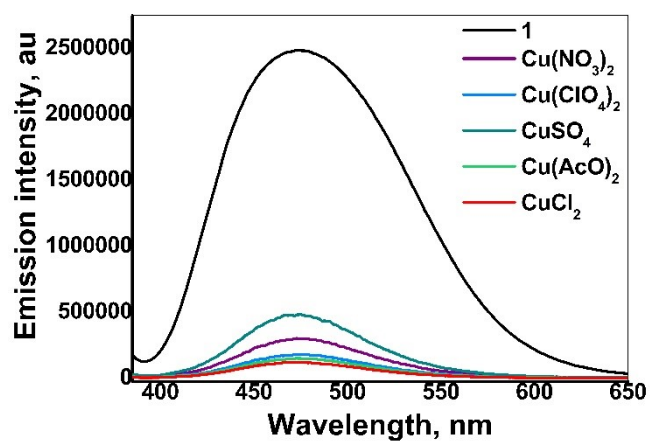

**Figure S11:** Emission spectral change of **1** (10  $\mu\text{M}$ ) in presence of different  $\text{Cu}^{2+}$  ion salts (300  $\mu\text{M}$ ) in water ( $\lambda_{\text{ex}} = 340 \text{ nm}$ ).

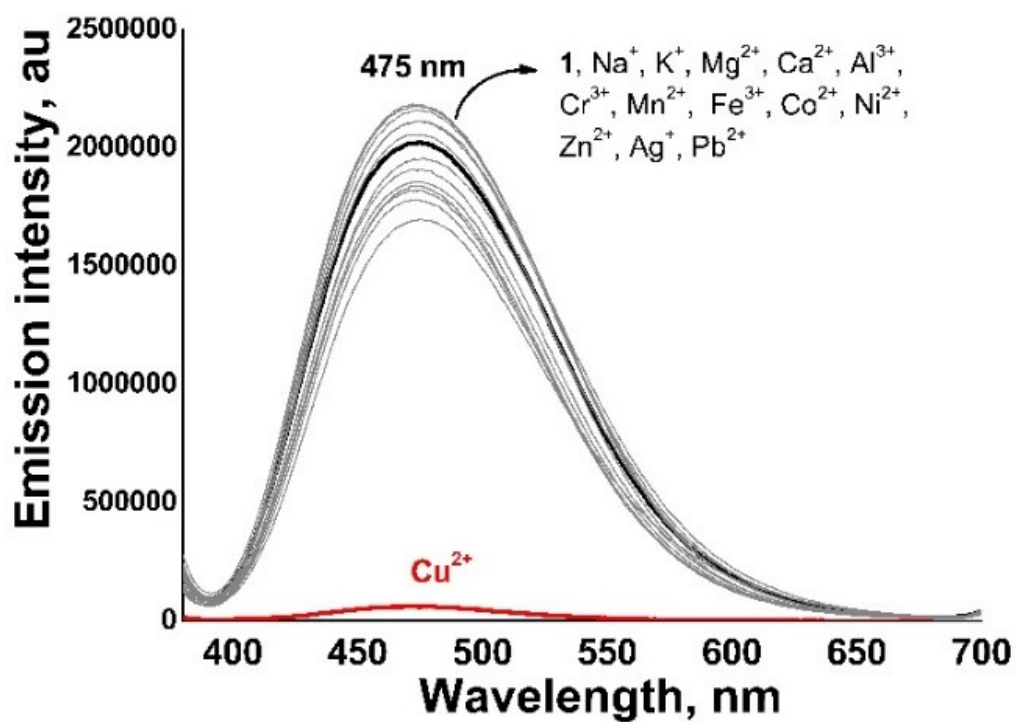

**Figure S12:** Emission spectral selectivity of **1** (10  $\mu\text{M}$ ) in the presence of different metal ion salts (300  $\mu\text{M}$ ) in water ( $\lambda_{\text{ex}} = 340 \text{ nm}$ ).

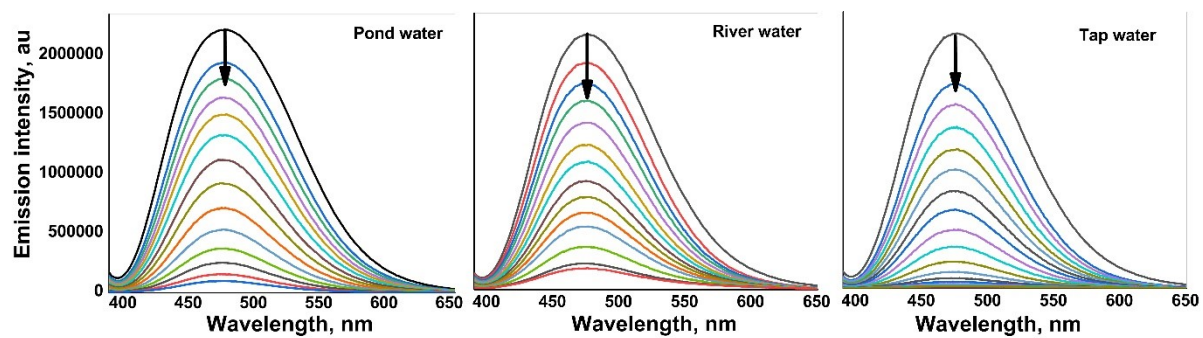

**Figure S13:** Emission spectral titration of **1** (10 μM) with the gradual addition of CuCl<sub>2</sub> (0-300 μM) in pond water, river water and tap water ( $\lambda_{\text{ex}}=340$  nm).
